# Supplementary material for: Characterization of the Inclusion Complexes of Isothiocyanates with γ-Cyclodextrin for Improvement of Antibacterial Activities against Staphylococcus aureus
Source: MDPI journal article supplement (doi:10.3390/foods11010060), 2021-12-27
Supplement: s1 [file s1]

**Figure S1.** UV-vis absorption spectrum of  $\gamma$ -CD and  $\gamma$ -CD-ITCs

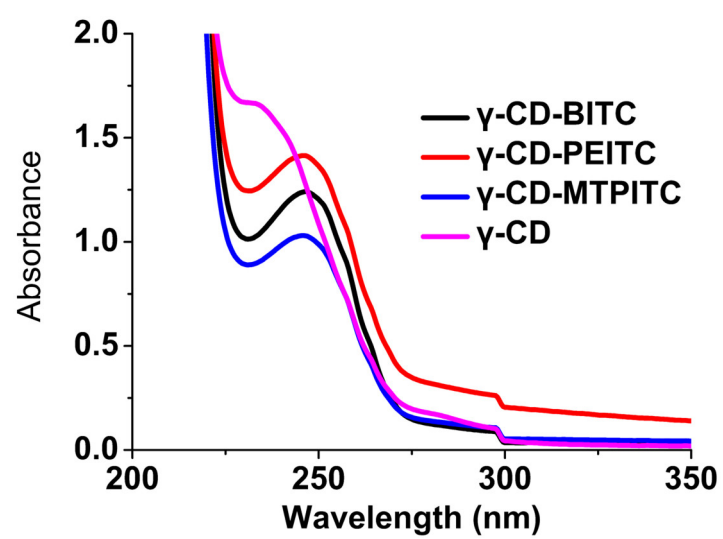

**Table S1.** Sequences of primers used in qRT-PCR

| Gene            | Primer            | Sequence (5'–3')         |
|-----------------|-------------------|--------------------------|
| <i>16S rRNA</i> | <i>16S rRNA-F</i> | CGTGCTACAATGGACAATACA    |
|                 | <i>16S rRNA-R</i> | ACAATCCGAACTGAGAACAAC    |
| <i>Cp8F</i>     | <i>Cp8F-F</i>     | ACAGACTTTAGTTATCCCTTAC   |
|                 | <i>Cp8F-R</i>     | TGATGCCAGTGATTACCTTTA    |
| <i>CP5D</i>     | <i>CP5D-F</i>     | CTTTAGTTGTTGGTGCTGGTC    |
|                 | <i>CP5D-R</i>     | CGGTTCAAGTTTCATTTCGTC    |
| <i>nuc</i>      | <i>nuc-F</i>      | GAAAGGGCAATACGCAAAG      |
|                 | <i>nuc-R</i>      | ACGCCATTATCTGTTTG        |
| <i>spa</i>      | <i>spa-F</i>      | ATAAGAAGCAACCAGCAAAC     |
|                 | <i>spa-R</i>      | GGCTAATGATAATCCACCAA     |
| <i>clf</i>      | <i>clf-F</i>      | ACGAATGGCGATGTTGTAGC     |
|                 | <i>clf-R</i>      | CTCGGTCTGTAAATAAAGGTAATG |
| <i>SarA</i>     | <i>SarA-F</i>     | ATGATTGCTTTGAGTTGTTA     |
|                 | <i>SarA-R</i>     | TTTGTTTTCGCTGATGTATG     |
| <i>agr</i>      | <i>agr-F</i>      | AGACCTGCATCCCTAATCGTA    |
|                 | <i>agr-R</i>      | TCAGTTTGCCACGTATCTCA     |

**Table S2.** Growth parameters of secondary models to predict the growth of *S. aureus* under BITC and  $\gamma$ -CD-BITC

| Parameter | Temperature (°C) | Sulfur-containing spices           |                          |                            |
|-----------|------------------|------------------------------------|--------------------------|----------------------------|
|           |                  | Control                            | BITC                     | $\gamma$ -CD-BITC          |
| SGR       | 10               | 0.03±0.00 <sup>Aa</sup>            | -0.02±0.00 <sup>Ab</sup> | -0.02±0.00 <sup>Ab</sup>   |
|           | 15               | 0.05±0.00 <sup>Aa</sup>            | -0.02±0.00 <sup>Ab</sup> | -0.02±0.00 <sup>Ab</sup>   |
|           | 20               | 0.10±0.01 <sup>Ba</sup>            | 0.05±0.00 <sup>Bb</sup>  | 0.04±0.00 <sup>Bc</sup>    |
|           | 25               | 0.24±0.01 <sup>Ca</sup>            | 0.13±0.01 <sup>Cb</sup>  | 0.10±0.01 <sup>Cb</sup>    |
| LT        | 10               | 45.09±3.6 <sup>Aa</sup>            | 101.20±6.1 <sup>Ab</sup> | 234.30±11.17 <sup>Ac</sup> |
|           | 15               | 21.77±2.3 <sup>Ba</sup>            | 44.34±3.7 <sup>Bb</sup>  | 106.90±5.37 <sup>Bc</sup>  |
|           | 20               | 14.39±1.4 <sup>B<sub>a</sub></sup> | 22.10±2.2 <sup>Ca</sup>  | 35.34±2.2 <sup>Cb</sup>    |
|           | 25               | 10.90±0.60 <sup>Ca</sup>           | 18.51±0.81 <sup>Cb</sup> | 23.89±1.3 <sup>Cc</sup>    |

SGR, maximum specific growth rate; LT, lag time; T, temperature.  $P < 0.05$ .

**Table S3.** Development and validation of secondary models for growth factors of *S. aureus* in cooked chicken breast under BITC and  $\gamma$ -CD-BITC

| Sulfur-containing spices | Secondary model equations                            | Bf   | Af   | R <sup>2</sup> |
|--------------------------|------------------------------------------------------|------|------|----------------|
| Control                  | SGR = 0.14211-0.02123×T + 0.0009819 × T <sup>2</sup> | 1.00 | 1.04 | 0.97           |
|                          | LT = 105.60–7.892×T + 0.16423 × T <sup>2</sup>       | 1.00 | 1.08 | 0.94           |
| BITC                     | SGR = 0.11667-0.02484×T + 0.00105 × T <sup>2</sup>   | 0.94 | 1.23 | 0.90           |
|                          | LT = 272.22–22.22×T + 0.48278 × T <sup>2</sup>       | 1.00 | 1.05 | 0.98           |
| $\gamma$ -CD-BITC        | SGR = 0.10784-0.02128×T + 0.0008718 × T <sup>2</sup> | 1.02 | 1.21 | 0.91           |
|                          | LT = 671.37–55.37×T + 1.1789×T <sup>2</sup>          | 1.00 | 1.00 | 0.99           |

SGR, maximum specific growth rate; LT, lag time; T, temperature. Bf, bias factor; Af, accuracy factor; R<sup>2</sup>, correlation coefficient.
